# Supplementary material for: Tango1 spatially organizes ER exit sites to control ER export
Source: PubMed Central journal article supplement — J Cell Biol. 2017 Apr 3;216(4):1035–49. doi: 10.1083/jcb.201611088 (PMC5379956; doi:10.1083/jcb.201611088), 2017-04-03
Supplement: JCB_201611088_sm.pdf [file JCB_201611088_sm.pdf]

Liu et al., <https://doi.org/10.1083/jcb.201611088>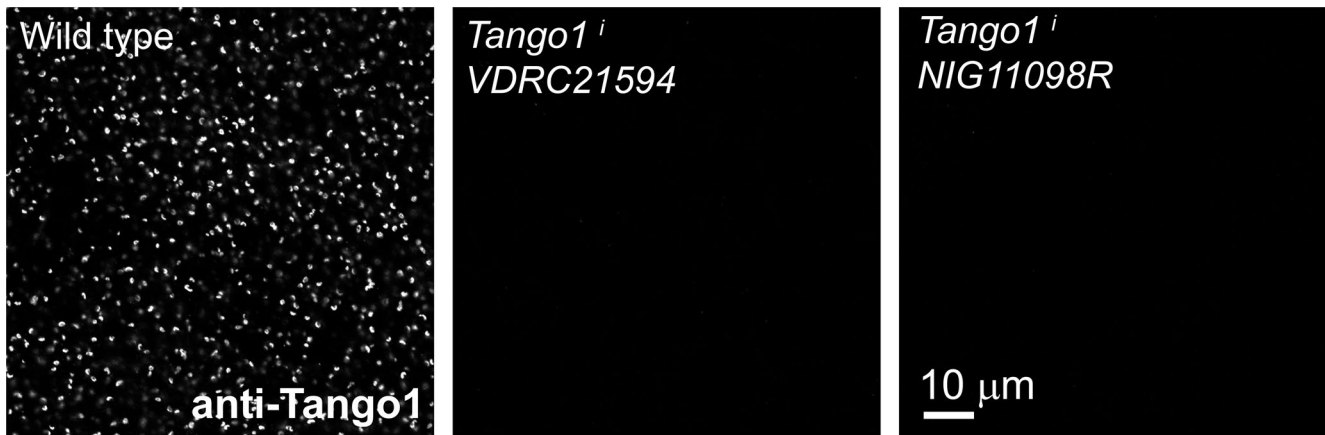

Figure S1. **Efficiency of Tango1 knockdown.** Confocal images of wild-type and *Cg>Tango1<sup>i</sup>*, where Tango1 has been knocked down with two different constructs. Tango1 expression was visualized with anti-Tango1 antibody staining.

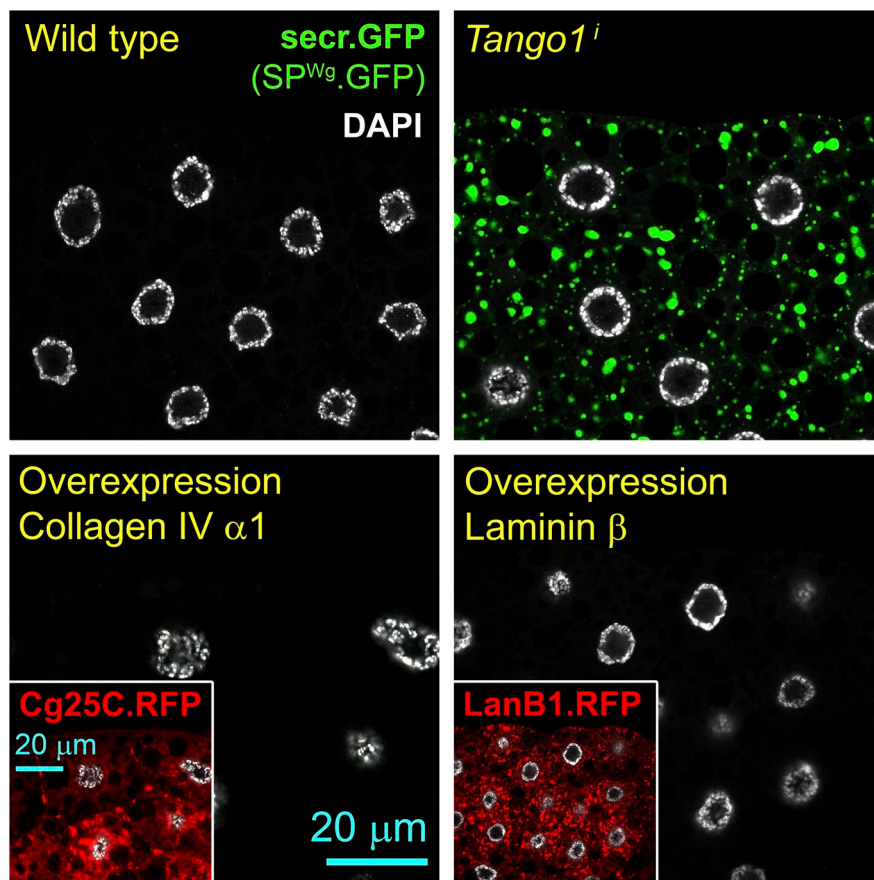

Figure S2. **Overexpression of Collagen IV or Laminin single chains does not impair general secretion.** Fat body cells expressing secreted GFP under control of BM-40-SPARC-GAL4 (*BM-40-SPARC>secr.GFP*, green). Images are of wild-type fat body, *Tango1<sup>i</sup>* fat body, and fat body overexpressing Collagen IV  $\alpha$ 1 chain (Cg25C.RFP) and Laminin  $\beta$  chain (LanB1.RFP).

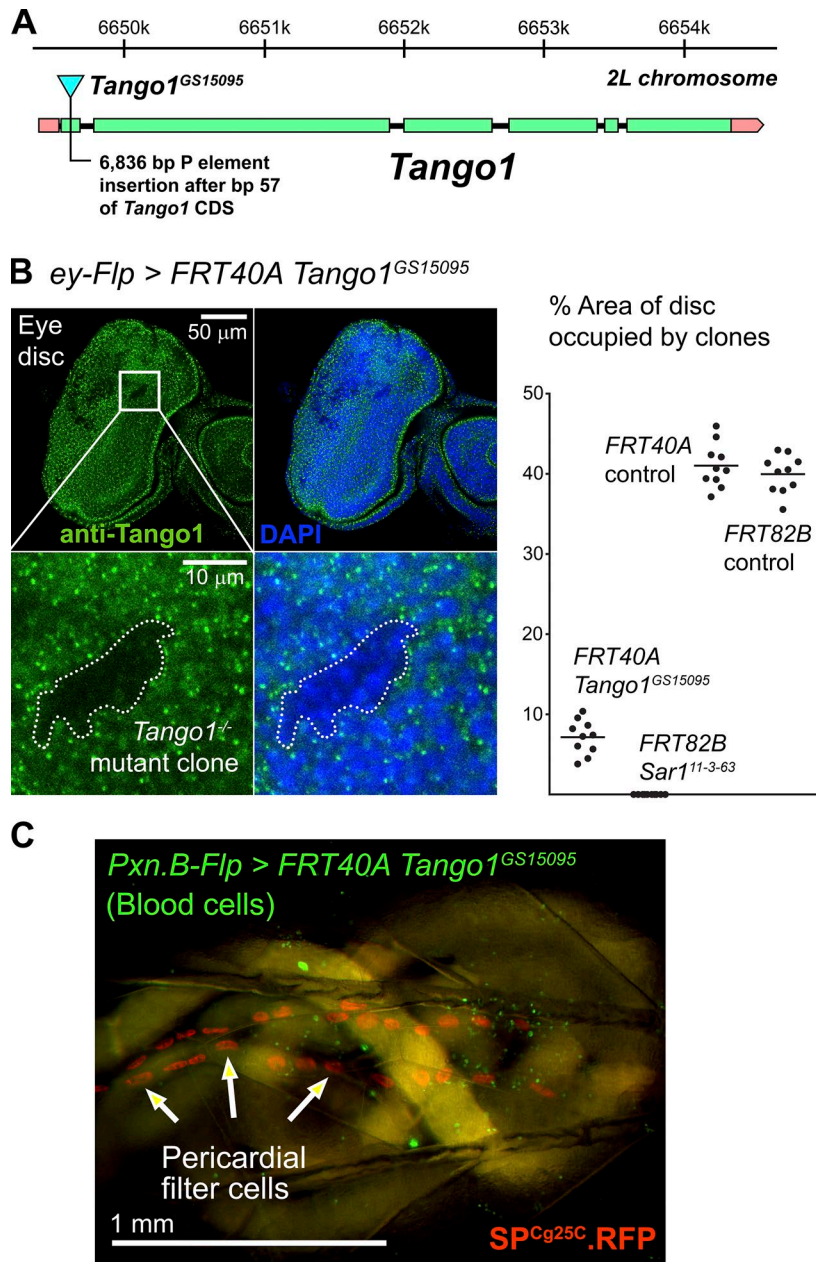

Figure S3. **Analysis of *Tango1* mutant mosaics.** (A) Graphic representation of the genomic organization of the *Tango1* gene and *Tango1<sup>GS15095</sup>* mutation caused by a transposon insertion into the first coding exon of the gene. (B) Confocal image of an eye disc showing clones of *FRT40A Tango1<sup>GS15095</sup>* homozygous mutant cells (absence of *Tango1* antibody staining). Unlike *FRT82B Sar1<sup>11-3-63</sup>* clones, *FRT40A Tango1<sup>GS15095</sup>* clones can be recovered but show reduced viability, as indicated by the reduced area they occupy in discs when compared with wild-type *FRT40A* control clones. Area occupied by clones in 10 discs per genotype ( $n = 10$ ) is represented in the graph. Horizontal lines indicate mean area. (C) Detail of a larva containing *FRT40A Tango1<sup>GS15095</sup>* homozygous mutant hemocytes (blood cells) expressing cytoplasmic GFP as a marker and secreted RFP (*act>SP<sup>Cg25C</sup>.RFP*). RFP accumulation in pericardial filter cells shows that *FRT40A Tango1<sup>GS15095</sup>* mutant cells are capable of secretion.

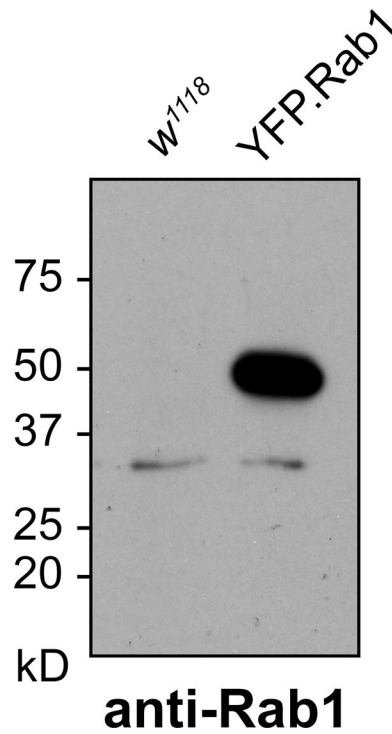

Figure S4. **Anti-Rab1 antibody.** Fat body lysates from wild-type and *Cg>YFP.Rab1* larvae were Western blotted with rabbit anti-Rab1 antibody generated in this study. YFP.Rab1 expression results in a strong band of higher molecular weight than endogenous, untagged Rab1.

Table S1. **Predicted molecular mass of secreted proteins in this study**

| Proteins                                       | Molecular mass |
|------------------------------------------------|----------------|
|                                                | <i>kD</i>      |
| Vkg (Col IV $\alpha 2$ )                       | 193.8          |
| Cg25C (Col IV $\alpha 1$ )                     | 174.3          |
| Col IV trimer $\alpha 1 + \alpha 2 + \alpha 1$ | 542.4          |
| Rfabg (ApoB)                                   | 372.7          |
| Trol (Perlecan)                                | 316.8–496.9    |
| Ndg (Nidogen)                                  | 149.1          |
| Fat-spondin                                    | 84.9           |
| Fer1HCH (Ferritin)                             | 13.6–27.9      |
| Hedgehog                                       | 52.1           |
| Sgs3                                           | 32.2           |
| VSVG                                           | 57.5           |
| GFP/RFP/YFP                                    | 26.9           |

Table S2. **Rescue of Tango1 knockdown by cytoplasmic Tango1**

| <i>w ; Cg-GAL4 x w ; UAS-Tango1.RNA<sup>i</sup>NIG11098R / TM6B</i> |                                   | <i>w ; Cg-GAL4 ; UAS-GFP.Tango1<sup>CYT</sup> x w ; UAS-Tango1.RNA<sup>i</sup>NIG11098R / TM6B</i> |                                                          |
|---------------------------------------------------------------------|-----------------------------------|----------------------------------------------------------------------------------------------------|----------------------------------------------------------|
| <i>w ; Cg-GAL4 / + ; Tango1.RNA<sup>i</sup>NIG11098R / +</i>        | <i>w ; Cg-GAL4 / + ; TM6B / +</i> | <i>w ; Cg-GAL4 / + ; Tango1.RNA<sup>i</sup>NIG11098R / GFP.Tango1<sup>CYT</sup></i>                | <i>w ; Cg-GAL4 / + ; TM6B / GFP.Tango1<sup>CYT</sup></i> |
| 0                                                                   | 78                                | 101                                                                                                | 87                                                       |

Number of adults and their genotype in the progeny of indicated crosses.

Table S3. Experimental genotypes

| Figure         | Genotype                                                                                                                                                                                                                                                                                                                                                                                                                                                                                                                                                                                                                                                                                                                                                                                                                                                                                                                                                                                                                                                                                                                                                                                                                                                                                                                                                                                                                                              |
|----------------|-------------------------------------------------------------------------------------------------------------------------------------------------------------------------------------------------------------------------------------------------------------------------------------------------------------------------------------------------------------------------------------------------------------------------------------------------------------------------------------------------------------------------------------------------------------------------------------------------------------------------------------------------------------------------------------------------------------------------------------------------------------------------------------------------------------------------------------------------------------------------------------------------------------------------------------------------------------------------------------------------------------------------------------------------------------------------------------------------------------------------------------------------------------------------------------------------------------------------------------------------------------------------------------------------------------------------------------------------------------------------------------------------------------------------------------------------------|
| <b>Fig. 1</b>  | <b>Imaging of ERES–Golgi units through SIM microscopy</b>                                                                                                                                                                                                                                                                                                                                                                                                                                                                                                                                                                                                                                                                                                                                                                                                                                                                                                                                                                                                                                                                                                                                                                                                                                                                                                                                                                                             |
| A–C            | <i>w</i> <sup>1118</sup>                                                                                                                                                                                                                                                                                                                                                                                                                                                                                                                                                                                                                                                                                                                                                                                                                                                                                                                                                                                                                                                                                                                                                                                                                                                                                                                                                                                                                              |
| D              | <i>w</i> <i>Gmap</i> <sup>KM0132</sup> <i>GFP</i>                                                                                                                                                                                                                                                                                                                                                                                                                                                                                                                                                                                                                                                                                                                                                                                                                                                                                                                                                                                                                                                                                                                                                                                                                                                                                                                                                                                                     |
| E              | <i>w</i> ; <i>Cg-GAL4</i> / +; <i>UAS-RFP.Rab1.3.1</i> / +                                                                                                                                                                                                                                                                                                                                                                                                                                                                                                                                                                                                                                                                                                                                                                                                                                                                                                                                                                                                                                                                                                                                                                                                                                                                                                                                                                                            |
| <b>Fig. 2</b>  | <b>Tango1 knockdown impairs general secretion in fat body cells</b>                                                                                                                                                                                                                                                                                                                                                                                                                                                                                                                                                                                                                                                                                                                                                                                                                                                                                                                                                                                                                                                                                                                                                                                                                                                                                                                                                                                   |
| A              | <i>w</i> ; <i>vkG</i> <sup>G454</sup> <i>GFP</i> <i>UAS-myr.RFP</i> / +; <i>BM-40-SPARC-GAL4</i> / + <i>w</i> ; <i>vkG</i> <sup>G454</sup> <i>GFP</i> <i>UAS-myr.RFP</i> / +; <i>BM-40-SPARC-GAL4</i> / <i>UAS-PH4αEFB</i> . <i>RNAi</i> <sup>VDR.C.2464</sup> <i>w</i> ; <i>vkG</i> <sup>G454</sup> <i>GFP</i> <i>UAS-myr.RFP</i> / +; <i>BM-40-SPARC-GAL4</i> / <i>UAS-Tango1</i> . <i>RNAi</i> <sup>VDR.C.21594</sup> <i>w</i> ; <i>vkG</i> <sup>G454</sup> <i>GFP</i> <i>UAS-myr.RFP</i> / +; <i>BM-40-SPARC-GAL4</i> / <i>UAS-PH4αEFB</i> . <i>RNAi</i> <sup>VDR.C.2464</sup> <i>Tango1</i> . <i>RNAi</i> <sup>VDR.C.21594</sup>                                                                                                                                                                                                                                                                                                                                                                                                                                                                                                                                                                                                                                                                                                                                                                                                                 |
| B              | <i>w</i> ; <i>vkG</i> <sup>G454</sup> <i>GFP</i> / +; <i>BM-40-SPARC-GAL4</i> / + <i>w</i> ; <i>vkG</i> <sup>G454</sup> <i>GFP</i> / +; <i>BM-40-SPARC-GAL4</i> / <i>UAS-Tango1</i> . <i>RNAi</i> <sup>VDR.C.21594</sup>                                                                                                                                                                                                                                                                                                                                                                                                                                                                                                                                                                                                                                                                                                                                                                                                                                                                                                                                                                                                                                                                                                                                                                                                                              |
| C              | <i>w</i> ; <i>Cg-GAL4</i> / +; <i>UAS-Tango1</i> . <i>RNAi</i> <sup>VDR.C.21594</sup> / +                                                                                                                                                                                                                                                                                                                                                                                                                                                                                                                                                                                                                                                                                                                                                                                                                                                                                                                                                                                                                                                                                                                                                                                                                                                                                                                                                             |
| D              | <i>w</i> ; <i>Cg-GAL4</i> / +; <i>UAS-SP<sup>V</sup>g.RFP</i> / + <i>w</i> ; <i>Cg-GAL4</i> / +; <i>UAS-SP<sup>C</sup>g25C.RFP</i> / + <i>w</i> ; <i>Cg-GAL4</i> / +; <i>UAS-SP<sup>V</sup>g.RFP</i> / <i>UAS-Tango1</i> . <i>RNAi</i> <sup>VDR.C.21594</sup> <i>w</i> ; <i>Cg-GAL4</i> / +; <i>UAS-SP<sup>C</sup>g25C.RFP</i> / <i>UAS-Tango1</i> . <i>RNAi</i> <sup>VDR.C.21594</sup>                                                                                                                                                                                                                                                                                                                                                                                                                                                                                                                                                                                                                                                                                                                                                                                                                                                                                                                                                                                                                                                               |
| E              | <i>w</i> ; <i>Cg-GAL4</i> / +; <i>Rfabg.sGFP</i> <sup>TRG.900</sup> / + <i>w</i> <i>tro</i> <sup>ICPTI-002049</sup> <i>YFP</i> / <i>w</i> ; <i>BM-40-SPARC-GAL4</i> <i>UAS-myr.RFP</i> / + <i>w</i> <sup>1118</sup> <i>w</i> ; <i>fat-spondin</i> <sup>CPT001685</sup> <i>YFP</i> / +; <i>BM-40-SPARC-GAL4</i> <i>UAS-myr.RFP</i> / + <i>w</i> ; <i>Cg-GAL4</i> <i>UAS-myr.RFP</i> / +; <i>Fer1HCH</i> <sup>G188</sup> <i>GFP</i> / + <i>w</i> ; <i>UAS-secr-GFP</i> / +; <i>BM-40-SPARC-GAL4</i> <i>UAS-myr.RFP</i> / + <i>w</i> ; <i>Cg-GAL4</i> / +; <i>Rfabg.sGFP</i> <sup>TRG.900</sup> / <i>UAS-Tango1</i> . <i>RNAi</i> <sup>VDR.C.21594</sup> <i>w</i> <i>tro</i> <sup>ICPTI-002049</sup> <i>YFP</i> / <i>w</i> ; <i>BM-40-SPARC-GAL4</i> <i>UAS-myr.RFP</i> / <i>UAS-Tango1</i> . <i>RNAi</i> <sup>VDR.C.21594</sup> <i>w</i> ; <i>Cg-GAL4</i> / +; <i>UAS-Tango1</i> . <i>RNAi</i> <sup>VDR.C.21594</sup> / + <i>w</i> ; <i>fat-spondin</i> <sup>CPT001685</sup> <i>YFP</i> / +; <i>BM-40-SPARC-GAL4</i> <i>UAS-myr.RFP</i> / <i>UAS-Tango1</i> . <i>RNAi</i> <sup>VDR.C.21594</sup> <i>w</i> ; <i>Cg-GAL4</i> <i>UAS-myr.RFP</i> / +; <i>Fer1HCH</i> <sup>G188</sup> <i>GFP</i> / <i>UAS-Tango1</i> . <i>RNAi</i> <sup>VDR.C.21594</sup> <i>w</i> ; <i>UAS-secr-GFP</i> / +; <i>BM-40-SPARC-GAL4</i> <i>UAS-myr.RFP</i> / <i>UAS-Tango1</i> . <i>RNAi</i> <sup>VDR.C.21594</sup>                                                           |
| <b>Fig. 3</b>  | <b>Tango1 is widely expressed and required for secretion in salivary glands and disc cells</b>                                                                                                                                                                                                                                                                                                                                                                                                                                                                                                                                                                                                                                                                                                                                                                                                                                                                                                                                                                                                                                                                                                                                                                                                                                                                                                                                                        |
| A              | <i>w</i> <sup>1118</sup>                                                                                                                                                                                                                                                                                                                                                                                                                                                                                                                                                                                                                                                                                                                                                                                                                                                                                                                                                                                                                                                                                                                                                                                                                                                                                                                                                                                                                              |
| B              | <i>w</i> ; <i>Sgs3-GFP</i> / +; <i>He-GAL4</i> <i>UAS-myr.RFP</i> / + <i>w</i> ; <i>Sgs3-GFP</i> / +; <i>He-GAL4</i> <i>UAS-myr.RFP</i> / <i>UAS-Tango1</i> . <i>RNAi</i> <sup>VDR.C.21594</sup>                                                                                                                                                                                                                                                                                                                                                                                                                                                                                                                                                                                                                                                                                                                                                                                                                                                                                                                                                                                                                                                                                                                                                                                                                                                      |
| C              | <i>w</i> ; <i>UAS-hh.GFP</i> / +; <i>hh-GAL4</i> / + <i>w</i> ; <i>UAS-hh.GFP</i> / +; <i>hh-GAL4</i> / <i>UAS-Tango1</i> . <i>RNAi</i> <sup>VDR.C.21594</sup>                                                                                                                                                                                                                                                                                                                                                                                                                                                                                                                                                                                                                                                                                                                                                                                                                                                                                                                                                                                                                                                                                                                                                                                                                                                                                        |
| D              | <i>w</i> ; <i>UAS-secr.GFP</i> / +; <i>rn-GAL4</i> / + <i>w</i> ; <i>UAS-secr.GFP</i> / +; <i>rn-GAL4</i> / <i>UAS-Tango1</i> . <i>RNAi</i> <sup>VDR.C.21594</sup>                                                                                                                                                                                                                                                                                                                                                                                                                                                                                                                                                                                                                                                                                                                                                                                                                                                                                                                                                                                                                                                                                                                                                                                                                                                                                    |
| <b>Fig. 4</b>  | <b>Tango1 differentially affects secretion of Collagen IV</b>                                                                                                                                                                                                                                                                                                                                                                                                                                                                                                                                                                                                                                                                                                                                                                                                                                                                                                                                                                                                                                                                                                                                                                                                                                                                                                                                                                                         |
| A              | <i>w</i> ; <i>vkG</i> <sup>G454</sup> <i>GFP</i> / +; <i>UAS-SP<sup>V</sup>g.RFP</i> <i>BM-40-SPARC-GAL4</i> / <i>UAS-Tango1</i> . <i>RNAi</i> <sup>VDR.C.21594</sup> <i>w</i> ; <i>vkG</i> <sup>G454</sup> <i>GFP</i> / +; <i>UAS-SP<sup>V</sup>g.RFP</i> <i>BM-40-SPARC-GAL4</i> / <i>UAS-Sec23</i> . <i>RNAi</i> <sup>VDR.C.24552GD</sup> <i>w</i> ; <i>vkG</i> <sup>G454</sup> <i>GFP</i> / +; <i>UAS-SP<sup>V</sup>g.RFP</i> <i>BM-40-SPARC-GAL4</i> / <i>UAS-Sar1</i> . <i>RNAi</i> <sup>VDR.C.34192GD</sup>                                                                                                                                                                                                                                                                                                                                                                                                                                                                                                                                                                                                                                                                                                                                                                                                                                                                                                                                    |
| B              | <i>w</i> ; <i>vkG</i> <sup>G454</sup> <i>GFP</i> <i>UAS-myr.RFP</i> / +; <i>BM-40-SPARC-GAL4</i> / + <i>w</i> ; <i>UAS-secr.GFP</i> / +; <i>BM-40-SPARC-GAL4</i> <i>UAS-Dcr2</i> / + <i>w</i> ; <i>Ub-VSVG.GFP</i> / +; <i>BM-40-SPARC-GAL4</i> <i>UAS-myr.RFP</i> / + <i>w</i> ; <i>vkG</i> <sup>G454</sup> <i>GFP</i> <i>UAS-myr.RFP</i> / +; <i>BM-40-SPARC-GAL4</i> / <i>UAS-Tango1</i> . <i>RNAi</i> <sup>VDR.C.21594</sup> <i>w</i> ; <i>vkG</i> <sup>G454</sup> <i>GFP</i> <i>UAS-myr.RFP</i> / +; <i>BM-40-SPARC-GAL4</i> / <i>UAS-Sec23</i> . <i>RNAi</i> <sup>VDR.C.24552GD</sup> <i>w</i> ; <i>vkG</i> <sup>G454</sup> <i>GFP</i> <i>UAS-myr.RFP</i> / +; <i>BM-40-SPARC-GAL4</i> / <i>UAS-Sar1</i> . <i>RNAi</i> <sup>VDR.C.34192GD</sup> <i>w</i> ; <i>UAS-secr.GFP</i> / +; <i>BM-40-SPARC-GAL4</i> <i>UAS-Dcr2</i> / <i>UAS-Tango1</i> . <i>RNAi</i> <sup>VDR.C.21594</sup> <i>w</i> ; <i>UAS-secr.GFP</i> / +; <i>BM-40-SPARC-GAL4</i> <i>UAS-Dcr2</i> / <i>UAS-Sar1</i> . <i>RNAi</i> <sup>VDR.C.34192GD</sup> <i>w</i> ; <i>Ub-VSVG.GFP</i> / +; <i>BM-40-SPARC-GAL4</i> <i>UAS-myr.RFP</i> / <i>UAS-Tango1</i> . <i>RNAi</i> <sup>VDR.C.21594</sup> <i>w</i> ; <i>Ub-VSVG.GFP</i> / +; <i>BM-40-SPARC-GAL4</i> <i>UAS-myr.RFP</i> / <i>UAS-Sec23</i> . <i>RNAi</i> <sup>VDR.C.24552GD</sup> <i>w</i> ; <i>Ub-VSVG.GFP</i> / +; <i>BM-40-SPARC-GAL4</i> <i>UAS-myr.RFP</i> / <i>UAS-Sar1</i> . <i>RNAi</i> <sup>VDR.C.34192GD</sup> |
| <b>Fig. 5</b>  | <b>Loss of Tango1 produces smaller ERES uncoupled from Golgi</b>                                                                                                                                                                                                                                                                                                                                                                                                                                                                                                                                                                                                                                                                                                                                                                                                                                                                                                                                                                                                                                                                                                                                                                                                                                                                                                                                                                                      |
| A              | <i>w</i> ; <i>Cg-GAL4</i> / +; <i>Sec16.sGFP</i> <sup>TRG.1259</sup> / + <i>w</i> ; <i>Cg-GAL4</i> / +; <i>Sec16.sGFP</i> <sup>TRG.1259</sup> / <i>UAS-Tango1</i> . <i>RNAi</i> <sup>VDR.C.21594</sup>                                                                                                                                                                                                                                                                                                                                                                                                                                                                                                                                                                                                                                                                                                                                                                                                                                                                                                                                                                                                                                                                                                                                                                                                                                                |
| B              | <i>w</i> ; <i>Cg-GAL4</i> / +; <i>Sec16.sGFP</i> <sup>TRG.1259</sup> / + <i>w</i> ; <i>Cg-GAL4</i> / +; <i>Sec16.sGFP</i> <sup>TRG.1259</sup> / <i>UAS-Tango1</i> . <i>RNAi</i> <sup>VDR.C.21594</sup>                                                                                                                                                                                                                                                                                                                                                                                                                                                                                                                                                                                                                                                                                                                                                                                                                                                                                                                                                                                                                                                                                                                                                                                                                                                |
| C              | <i>y</i> <i>w</i> ; <i>Sec16.sGFP</i> <sup>TRG.1259</sup> ( <i>y</i> ) <i>w</i> ; <i>Tango1</i> <sup>G515095</sup> ; <i>Sec16.sGFP</i> <sup>TRG.1259</sup>                                                                                                                                                                                                                                                                                                                                                                                                                                                                                                                                                                                                                                                                                                                                                                                                                                                                                                                                                                                                                                                                                                                                                                                                                                                                                            |
| D              | <i>w</i> ; <i>Cg-GAL4</i> <i>UAS-Grasp65.GFP</i> / + <i>w</i> ; <i>Cg-GAL4</i> / +; <i>UAS-YFP.Rab1</i> / + <i>w</i> ; <i>Cg-GAL4</i> <i>UAS-Grasp65.GFP</i> / +; <i>UAS-RFP.Rab1</i> / + <i>w</i> ; <i>Cg-GAL4</i> <i>UAS-Grasp65.GFP</i> / +; <i>UAS-Tango1</i> . <i>RNAi</i> <sup>VDR.C.21594</sup> / + <i>w</i> ; <i>Cg-GAL4</i> / +; <i>UAS-YFP.Rab1</i> / <i>UAS-Tango1</i> . <i>RNAi</i> <sup>VDR.C.21594</sup> <i>w</i> ; <i>Cg-GAL4</i> <i>UAS-Grasp65.GFP</i> / +; <i>UAS-RFP.Rab1.3.1</i> / <i>UAS-Tango1</i> . <i>RNAi</i> <sup>VDR.C.21594</sup>                                                                                                                                                                                                                                                                                                                                                                                                                                                                                                                                                                                                                                                                                                                                                                                                                                                                                         |
| E              | <i>w</i> ; <i>Cg-GAL4</i> / +; <i>Sec16.sGFP</i> <sup>TRG.1259</sup> / <i>UAS-Tango1</i> . <i>RNAi</i> <sup>VDR.C.21594</sup> (anti-GM130) <i>w</i> ; <i>Cg-GAL4</i> <i>UAS-Grasp65.GFP</i> / +; <i>UAS-Tango1</i> . <i>RNAi</i> <sup>VDR.C.21594</sup> (anti-Sec16) <i>w</i> ; <i>Cg-GAL4</i> / +; <i>UAS-YFP.Rab1</i> / <i>UAS-Tango1</i> . <i>RNAi</i> <sup>VDR.C.21594</sup> (anti-GM130) <i>w</i> ; <i>Cg-GAL4</i> <i>UAS-Grasp65.GFP</i> / +; <i>UAS-RFP.Rab1.3.1</i> / <i>UAS-Tango1</i> . <i>RNAi</i> <sup>VDR.C.21594</sup> <i>w</i> ; <i>Cg-GAL4</i> / +; <i>UAS-YFP.Rab1</i> / <i>UAS-Tango1</i> . <i>RNAi</i> <sup>VDR.C.21594</sup> (anti-Sec16)                                                                                                                                                                                                                                                                                                                                                                                                                                                                                                                                                                                                                                                                                                                                                                                         |
| <b>Fig. 6</b>  | <b>The cytoplasmic part of Tango1 directs ERES localization and can rescue Tango1 loss</b>                                                                                                                                                                                                                                                                                                                                                                                                                                                                                                                                                                                                                                                                                                                                                                                                                                                                                                                                                                                                                                                                                                                                                                                                                                                                                                                                                            |
| C              | <i>w</i> ; <i>Cg-GAL4</i> / +; <i>UAS-GFP.Tango1</i> <sup>CYT.3.1</sup> / +                                                                                                                                                                                                                                                                                                                                                                                                                                                                                                                                                                                                                                                                                                                                                                                                                                                                                                                                                                                                                                                                                                                                                                                                                                                                                                                                                                           |
| D              | <i>w</i> ; <i>Cg-GAL4</i> / +; <i>UAS-Tango1</i> . <i>RNAi</i> <sup>NIG11098R</sup> / + <i>w</i> ; <i>Cg-GAL4</i> / +; <i>UAS-GFP.Tango1</i> <sup>CYT</sup> / <i>UAS-Tango1</i> . <i>RNAi</i> <sup>NIG11098R</sup>                                                                                                                                                                                                                                                                                                                                                                                                                                                                                                                                                                                                                                                                                                                                                                                                                                                                                                                                                                                                                                                                                                                                                                                                                                    |
| <b>Fig. 7</b>  | <b>Tango1 overexpression increases ERESs' size and number</b>                                                                                                                                                                                                                                                                                                                                                                                                                                                                                                                                                                                                                                                                                                                                                                                                                                                                                                                                                                                                                                                                                                                                                                                                                                                                                                                                                                                         |
| A              | <i>w</i> / <i>Y</i> OR <i>y</i> <i>v</i> <i>sc</i> ; <i>ptc-GAL4</i> / <i>UAS-Tango1.attP2</i>                                                                                                                                                                                                                                                                                                                                                                                                                                                                                                                                                                                                                                                                                                                                                                                                                                                                                                                                                                                                                                                                                                                                                                                                                                                                                                                                                        |
| B              | <i>w</i> ; <i>Cg-GAL4</i> / +; <i>UAS-SP.GFP.Tango1.3.1</i> / + <i>w</i> ; <i>Cg-GAL4</i> / +; <i>UAS-GFP.Tango1</i> <sup>CYT.3.1</sup> / + (30°C overexpression)                                                                                                                                                                                                                                                                                                                                                                                                                                                                                                                                                                                                                                                                                                                                                                                                                                                                                                                                                                                                                                                                                                                                                                                                                                                                                     |
| C              | <i>w</i> <sup>1118</sup> (anti-Tango1) <i>w</i> ; <i>Cg-GAL4</i> / +; <i>UAS-SP.GFP.Tango1.3.1</i> / +                                                                                                                                                                                                                                                                                                                                                                                                                                                                                                                                                                                                                                                                                                                                                                                                                                                                                                                                                                                                                                                                                                                                                                                                                                                                                                                                                |
| D              | <i>w</i> ; <i>Cg-GAL4</i> / +; <i>UAS-Tango1</i> . <i>RNAi</i> <sup>NIG11098R</sup> / + (anti-Sec16) <i>w</i> <sup>1118</sup> (fat body, anti-Tango1) <i>w</i> ; <i>Cg-GAL4</i> / +; <i>UAS-SP.GFP.Tango1.3.1</i> / + <i>w</i> <sup>1118</sup> (salivary gland, anti-Tango1)                                                                                                                                                                                                                                                                                                                                                                                                                                                                                                                                                                                                                                                                                                                                                                                                                                                                                                                                                                                                                                                                                                                                                                          |
| E              | <i>w</i> <sup>1118</sup> (anti-Gmap) <i>w</i> ; <i>Cg-GAL4</i> / +; <i>UAS-SP.GFP.Tango1.3.1</i> / + (anti-Gmap)                                                                                                                                                                                                                                                                                                                                                                                                                                                                                                                                                                                                                                                                                                                                                                                                                                                                                                                                                                                                                                                                                                                                                                                                                                                                                                                                      |
| <b>Fig. 8</b>  | <b>Multiple interactions of Tango1 at the ERES–Golgi interface</b>                                                                                                                                                                                                                                                                                                                                                                                                                                                                                                                                                                                                                                                                                                                                                                                                                                                                                                                                                                                                                                                                                                                                                                                                                                                                                                                                                                                    |
| A              | <i>w</i> ; <i>Cg-GAL4</i> ; <i>UAS-Tango1.FLAG.3.1</i> <i>UAS-Tango1.HA.3.1</i> <i>w</i> ; <i>Cg-GAL4</i> ; <i>UAS-Tango1.FLAG.3.1</i> <i>w</i> ; <i>Cg-GAL4</i> ; <i>UAS-Tango1.HA.3.1</i>                                                                                                                                                                                                                                                                                                                                                                                                                                                                                                                                                                                                                                                                                                                                                                                                                                                                                                                                                                                                                                                                                                                                                                                                                                                           |
| B              | <i>w</i> ; <i>Cg-GAL4</i> ; <i>UAS-Tango1.FLAG.3.1</i> <i>w</i> <sup>1118</sup>                                                                                                                                                                                                                                                                                                                                                                                                                                                                                                                                                                                                                                                                                                                                                                                                                                                                                                                                                                                                                                                                                                                                                                                                                                                                                                                                                                       |
| C              | <i>w</i> ; <i>Cg-GAL4</i> ; <i>UAS-YFP.Rab1</i> <i>w</i> <sup>1118</sup>                                                                                                                                                                                                                                                                                                                                                                                                                                                                                                                                                                                                                                                                                                                                                                                                                                                                                                                                                                                                                                                                                                                                                                                                                                                                                                                                                                              |
| D              | <i>w</i> ; <i>Cg-GAL4</i> <i>UAS-Grasp65.GFP</i> <i>w</i> <sup>1118</sup>                                                                                                                                                                                                                                                                                                                                                                                                                                                                                                                                                                                                                                                                                                                                                                                                                                                                                                                                                                                                                                                                                                                                                                                                                                                                                                                                                                             |
| E              | <i>w</i> ; <i>Cg-GAL4</i> ; <i>UAS-Tango1.FLAG.3.1</i> <i>w</i> <sup>1118</sup>                                                                                                                                                                                                                                                                                                                                                                                                                                                                                                                                                                                                                                                                                                                                                                                                                                                                                                                                                                                                                                                                                                                                                                                                                                                                                                                                                                       |
| F              | <i>w</i> ; <i>Cg-GAL4</i> ; <i>UAS-YFP.Rab1</i> <i>w</i> <sup>1118</sup>                                                                                                                                                                                                                                                                                                                                                                                                                                                                                                                                                                                                                                                                                                                                                                                                                                                                                                                                                                                                                                                                                                                                                                                                                                                                                                                                                                              |
| G              | <i>w</i> ; <i>Cg-GAL4</i> <i>UAS-Grasp65.GFP</i> <i>w</i> <sup>1118</sup>                                                                                                                                                                                                                                                                                                                                                                                                                                                                                                                                                                                                                                                                                                                                                                                                                                                                                                                                                                                                                                                                                                                                                                                                                                                                                                                                                                             |
| H              | <i>y</i> <i>w</i> ; <i>Sar1</i> <sup>CA07674</sup> <i>GFP</i> / <i>TM3</i> , <i>Ser Sb</i> <i>w</i> <sup>1118</sup>                                                                                                                                                                                                                                                                                                                                                                                                                                                                                                                                                                                                                                                                                                                                                                                                                                                                                                                                                                                                                                                                                                                                                                                                                                                                                                                                   |
| <b>Fig. S1</b> | <b>Efficiency of Tango1 knockdown</b>                                                                                                                                                                                                                                                                                                                                                                                                                                                                                                                                                                                                                                                                                                                                                                                                                                                                                                                                                                                                                                                                                                                                                                                                                                                                                                                                                                                                                 |

Table S3. **Experimental genotypes** (Continued)

| Figure         | Genotype                                                                                                                                                                                                                                                                                                                                                              |
|----------------|-----------------------------------------------------------------------------------------------------------------------------------------------------------------------------------------------------------------------------------------------------------------------------------------------------------------------------------------------------------------------|
|                | $w^{1118} w ; Cg-GAL4 / + ; UAS-Tango1.RNAi^{VDR21594} / + w ; Cg-GAL4 / + ; UAS-Tango1.RNAi^{NIG11098R} / +$                                                                                                                                                                                                                                                         |
| <b>Fig. S2</b> | <b>Overexpression of Collagen IV or Laminin single chains does not impair general secretion</b><br>$w ; UAS-secr.GFP / + ; BM-40-SPARC-GAL4 UAS-myr.RFP / + w ; UAS-secr.GFP / + ; BM-40-SPARC-GAL4 UAS-myr.RFP / UAS-Tango1.RNAi^{VDR21594} w ; UAS-secr.GFP / UAS-Cg25C.RFP.2.1 ; BM-40-SPARC-GAL4 / + w ; UAS-secr.GFP / + ; BM-40-SPARC-GAL4 / UAS-LanB1.RFP.3.1$ |
| <b>Fig. S3</b> | <b>Analysis of Tango1 mutant mosaics</b>                                                                                                                                                                                                                                                                                                                              |
| B              | $y w ey-Flp ; FRT40A Tango1^{GS15095} / FRT40A y w ey-Flp ; FRT40A Tango1^{GS15095} / FRT40A tub-GAL80 ; act-y^+-GAL4 UAS-GFP / + y w ey-Flp ; FRT40A / FRT40A tub-GAL80 ; act-y^+-GAL4 UAS-GFP / + y w ey-Flp ; act-y^+-GAL4 UAS-GFP / + ; FRT82B Sar^{111-3-63} / FRT82B tub-GAL80 y w ey-Flp ; act-y^+-GAL4 UAS-GFP / + ; FRT82B / FRT82B tub-GAL80$               |
| C              | $w Pxn.B-Flp.F12a ; FRT40A Tango1^{GS15095} / FRT40A tub-GAL80 ; act-y^+-GAL4 UAS-GFP / UAS-SP^{Cg25C}.RFP.3.1$                                                                                                                                                                                                                                                       |
| <b>Fig. S4</b> | <b>Anti-Rab1 antibody</b><br>$w^{1118} w ; Cg-GAL4 ; UAS-YFP.Rab1$                                                                                                                                                                                                                                                                                                    |
